# Supplementary material
Source: publisher figshare collection journal article supplement (https://acs.figshare.com/ndownloader/files/8025137)
Supplement: Supplementary file 1 [file 8025137]

## Supplementary Information

# Cage-Confinement Pyrolysis Route to Ultrasmall Tungsten Carbide Nanoparticles for Efficient Electrocatalytic Hydrogen Evolution

Yan-Tong Xu<sup>[a]</sup>, Xiaofen Xiao<sup>[c]</sup>, Zi-Ming Ye<sup>[a]</sup>, Shenlong Zhao<sup>[d]</sup>, Rongan Shen<sup>[b]</sup>, Chun-Ting He<sup>\*[a]</sup>, Jie-Peng Zhang<sup>\*[a]</sup>, Yadong Li<sup>\*[b]</sup>, and Xiao-Ming Chen<sup>[a]</sup>

<sup>[a]</sup>*MOE Key Laboratory of Bioinorganic and Synthetic Chemistry, School of Chemistry, Sun Yat-Sen University, Guangzhou 510275, China*

<sup>[b]</sup>*Department of Chemistry, Tsinghua University, Beijing 100084, China*

<sup>[c]</sup>*Key Laboratory for Polymeric Composite and Functional Materials of Ministry of Education, Key Laboratory of High Performance Polymer-Based Composites of Guangdong Province, School of Chemistry, Sun Yat-Sen University, Guangzhou 510275, China.*

<sup>[d]</sup>*CAS Key Laboratory of Nanosystem and Hierarchical Fabrication, CAS Center for Excellence in Nanoscience, National Center for Nanoscience and Technology, Beijing 100190, China*

Email: [hechunt@mail2.sysu.edu.cn](mailto:hechunt@mail2.sysu.edu.cn); [zhangjp7@mail.sysu.edu.cn](mailto:zhangjp7@mail.sysu.edu.cn); [ydli@mail.tsinghua.edu.cn](mailto:ydli@mail.tsinghua.edu.cn)

|                                                       |            |
|-------------------------------------------------------|------------|
| <b><u>S1. Experimental Section</u></b> .....          | <b>S3</b>  |
| <u>Synthesis of MAF-6</u> .....                       | S3         |
| <u>Synthesis of W(CO)<sub>6</sub>@MAF-6</u> .....     | S3         |
| <u>Synthesis of W(CO)<sub>6</sub>/MAF-6</u> .....     | S3         |
| <u>Synthesis of WC@NPC</u> .....                      | S3         |
| <u>Synthesis of W@NPC</u> .....                       | S4         |
| <u>Characterizations</u> .....                        | S4         |
| <u>Electrochemical Measurements</u> .....             | S4         |
| <u>Calculation Details</u> .....                      | S5         |
| <b><u>S2. Supporting Figures and Tables</u></b> ..... | <b>S7</b>  |
| <b><u>S3. References</u></b> .....                    | <b>S28</b> |

## S1. Experimental Section

All reagents were analytical grade and used without further purification. All solutions used in electrochemical experiments were prepared with Millipore water ( $\geq 18\text{ M}\Omega$ ).

### Synthesis of MAF-6

MAF-6 was prepared following our published procedure.<sup>1</sup> Aqueous ammonia solution (40 mL 25%) of  $\text{Zn}(\text{OH})_2$  (2 mmol) was added into methanol solution (30 mL) of 2-ethylimidazole (4 mmol) premixed with cyclohexane (8 mL). The mixture was stirred vigorously at room temperature for several hours. The resultant white powders were separated from solution by filtration and then dried at 150 °C under vacuum for 2 hours.

### Synthesis of $\text{W}(\text{CO})_6$ @MAF-6

MAF-6 (0.40 g) was placed in a 5-mL glass vial. This vial was placed in a glass bottle containing  $\text{W}(\text{CO})_6$  (0.66 mmol). The bottle was sealed and then heated under 85 °C for 24 hours. We also tried to reduce the amount of  $\text{W}(\text{CO})_6$  loading (0.275 mmol/g, or 9.1 wt%) to attain smaller WC particles, but the resultant sample showed similar WC particle sizes but less WC amount (Figure S11), as well as lower HER activity (Figure S19), as compared with titled material WC@NPC.

### Synthesis of $\text{W}(\text{CO})_6$ /MAF-6

Aqueous ammonia solution (40 mL 25%) of  $\text{Zn}(\text{OH})_2$  (2 mmol) was dropped into a methanol solution (30 mL), which was premixed with 2-ethylimidazole (4 mmol),  $\text{W}(\text{CO})_6$  (0.4 mmol) and cyclohexane (8 mL). The mixture was stirred violently at room temperature for several hours. The resultant white powders were separated from solution by filtration and then dried at room temperature in air for 10 hours.

### Synthesis of WC@NPC

$\text{W}(\text{CO})_6$ @MAF-6 (0.40 g) was carbonized under  $\text{N}_2$  atmosphere in a tube furnace, where the temperature was raised up from 30 °C to 980 °C at a heating rate of 2.5 °C/min. After holding at

980 °C for 5 hours, the temperature was cooled down to room temperature naturally to afford black powder. For comparison, W(CO)<sub>6</sub>/MAF-6 was also carbonized at three different temperatures (800, 900 and 1100 °C), but the lower temperatures are disadvantageous for the formation of WC (only W formation at 800°C while mixing phases of WC and W formation at 900 °C as judged by PXRD measurements, Figure S5) and the vaporization of Zn (judging by the EDS measurements as shown in Table S2) while higher temperature resulted in collapsing of carbon nanopolyhedron (Figures S5 and S6). Also, the sample carbonized at 980°C exhibits the best HER performances (Figure S18). Such worse performance of the samples carbonized at other temperatures should be resulted from the existence of lower active W and some residual inactive zinc (800 °C and 900 °C samples) or aggregation/non-uniform distribution on the surface of electrode for 1100 °C sample (collapsed/sintered carbon matrix was bad for affording homogenous catalyst ink by sonication). Therefore, WC@NPC used in this work refers to the sample carbonized at 980 °C.

### Synthesis of W@NPC

W(CO)<sub>6</sub>/MAF-6 (0.40 g) was carbonized under N<sub>2</sub> atmosphere in a tube furnace, where the temperature was raised up from 30 °C to 980 °C at a heating rate of 2.5 °C/min. After holding at 980 °C for 5 hours, the temperature was cooled down to room temperature naturally to afford black powder.

### Characterizations

Powder X-Ray diffraction (PXRD) patterns were recorded on a D8 DAVINCI X-ray powder diffractometer equipped with graphite monochromatized Cu K $\alpha$  radiation ( $\lambda = 1.5418 \text{ \AA}$ ). The diffractometer was operated with working voltage and current of 40 kV and 40 mA, respectively. Transmission electron microscopy (TEM) and high-resolution TEM (HRTEM) images were recorded on a JEM-2010HR apparatus working at an accelerating voltage of 200 kV. Energy-dispersive X-ray spectroscopy (EDS) was taken on a JEM-2010HR-Vantage typed energy spectrometer. Particle size distribution (PSD) plots were measured manually through the nanoparticle statistical software (Image J) from corresponding TEM images with at least 80 particles. Field-emission scanning electron microscopy (FE-SEM) was carried out with a Hitachi SU8010 apparatus working at an

acceleration voltage of 2 kV. X-ray photon spectroscopy (XPS) was performed on an ESCA Lab250 X-ray microprobe corrected by C1s peak at 284.6 eV. Nitrogen sorption experiments were operated at 77 K on a Micromeritics ASAP 2020 system. Prior to the measurement, the samples were degassed at 120°C for 10 h. Thermogravimetry (TG) was performed on a TA Q50 system under N<sub>2</sub> flow. Fourier transformed-infrared (FT-IR) spectra were recorded on a Bruker TENSOR 27 FT-IR spectrometer in the 400–4000 cm<sup>-1</sup> region with KBr pellets. Raman spectra were recorded by a Nicolet NXR 9650 FT-Raman Spectrometer.

## Electrochemical Measurements

All electrochemical experiments were conducted on a CHI 660 E electrochemical station (Shanghai Chenhua Co., China) in a standard three electrode cell in N<sub>2</sub>-saturated 0.5 M H<sub>2</sub>SO<sub>4</sub> at room temperature. A glassy carbon electrode (GCE, 5 mm in diameter), an Ag/AgCl electrode with saturated KCl, and a Pt wire were used as the working, reference and counter electrode, respectively. The possibility of Pt-deposition of the working electrode for HER electrocatalysis was excluded by the virtually identical LSV curves of WC@NPC by using Pt and graphite as counter electrodes (Figure S20), similar XPS results before and after HER testing (Figure S23), and almost no change of the current density during long-term electrolysis by using either a Pt or a graphite counter electrode (Figure S20b). Besides, the LSV curve of WC@NPC with H<sub>2</sub> bubbling is very similar with that from N<sub>2</sub>-bubbled testing (Figure S19). All electrode potentials were expressed in reference to the reversible hydrogen electrode (RHE), according to the Nernst equation:  $E_{\text{RHE}} = E_{\text{exp}} + E^{\theta}_{\text{Ag/AgCl}} + 0.0592\text{pH}$ . 5 mg of the catalysts were dispersed in 1.2 mL of 1:1 v/v water/alcohol with 20  $\mu\text{L}$  Nafion by sonication to form a homogeneous suspension. Typically, 10  $\mu\text{L}$  well-dispersed suspension (corresponding to a catalyst loading of 0.209 mg cm<sup>-2</sup>) was dropped on the glassy carbon electrode and then dried in an ambient environment for measurements. Linear sweep voltammetry (LSV) was tested with a scan rate of 5 mV s<sup>-1</sup> at 1600 rpm on rotating disc electrode (RDE) with *iR* compensation (correction of the voltage drop caused by resistance), which was done by the method of positive feedback, and the compensation level is 95%. The chronoamperometry (CA) was tested at an overpotential of -0.05V vs RHE after equilibrium. A flow of N<sub>2</sub> was maintained over the electrolyte during the experiment to eliminate dissolved dioxygen.

### Calculation details

The density functional theory (DFT) calculations were performed by the Dmol<sup>3</sup> module in Materials Studio 5.5 package, and generalized gradient approximation (GGA) with Perdew-Becke-Ernzerhof (PBE)<sup>2</sup> was used for the exchange-correlation functional. All of the models are calculated in a periodically repeated slab with a dimension of 9.84 Å × 9.84 Å × 15.4 Å to separate the interaction between periodic images. The Gamma scheme with 2 × 2 × 1 k-point mesh was used to represent the Brillouin zone. The energy, gradient and displacement convergence criteria were set as 1 × 10<sup>-5</sup> Ha, 2 × 10<sup>-3</sup> Å and 5 × 10<sup>-3</sup> Å, respectively. The free energy of the adsorbed state was calculated as

$$\Delta G_{H^*} = \Delta E_{H^*} + \Delta E_{ZPE} - T\Delta S$$

where  $\Delta E_{H^*}$  is the hydrogen chemisorption energy, and  $\Delta E_{ZPE}$  is the difference corresponding to the zero point energy between the adsorbed state and the gas phase. As the vibrational entropy of H\* in the adsorbed state is small, the entropy of adsorption of 1/2 H<sub>2</sub> is  $\Delta S_H \approx -0.5S_{0H_2}$ , where  $S_{0H_2}$  is the entropy of H<sub>2</sub> in the gas phase at the standard conditions. Therefore the overall corrections were taken as in<sup>3,4</sup>

$$\Delta G_{H^*} = \Delta E_{H^*} + 0.24 \text{ eV}$$

## S2. Supporting Figures and Tables

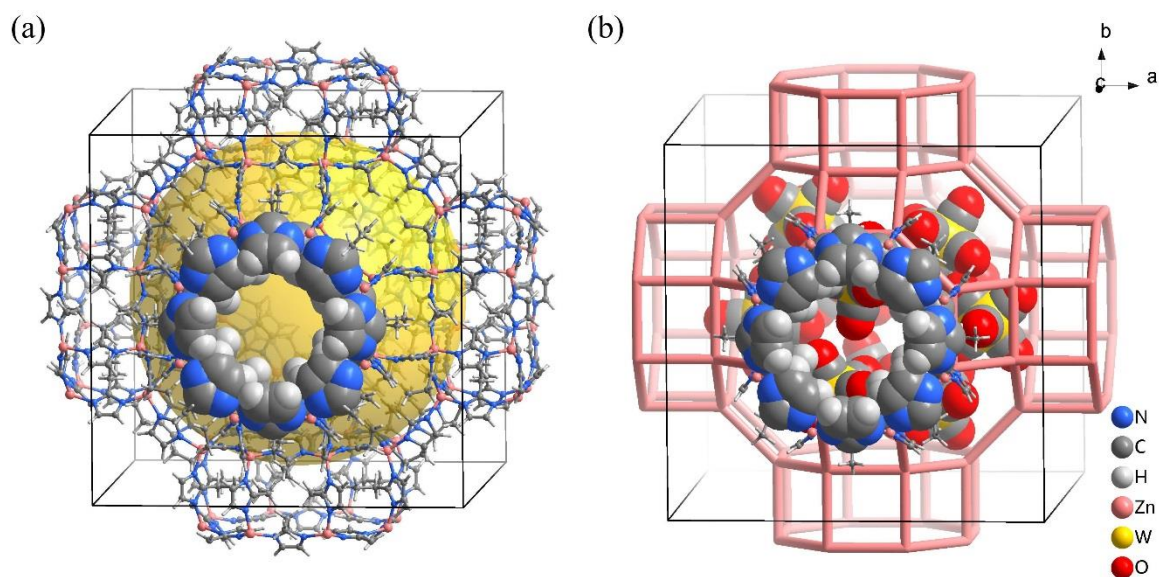

**Figure S1.** Perspective views of (a) the cage-based coordination framework of MAF-6 and (b) the cage-confined model of  $\text{W}(\text{CO})_6@MAF-6$  (derived from GCMC simulation).

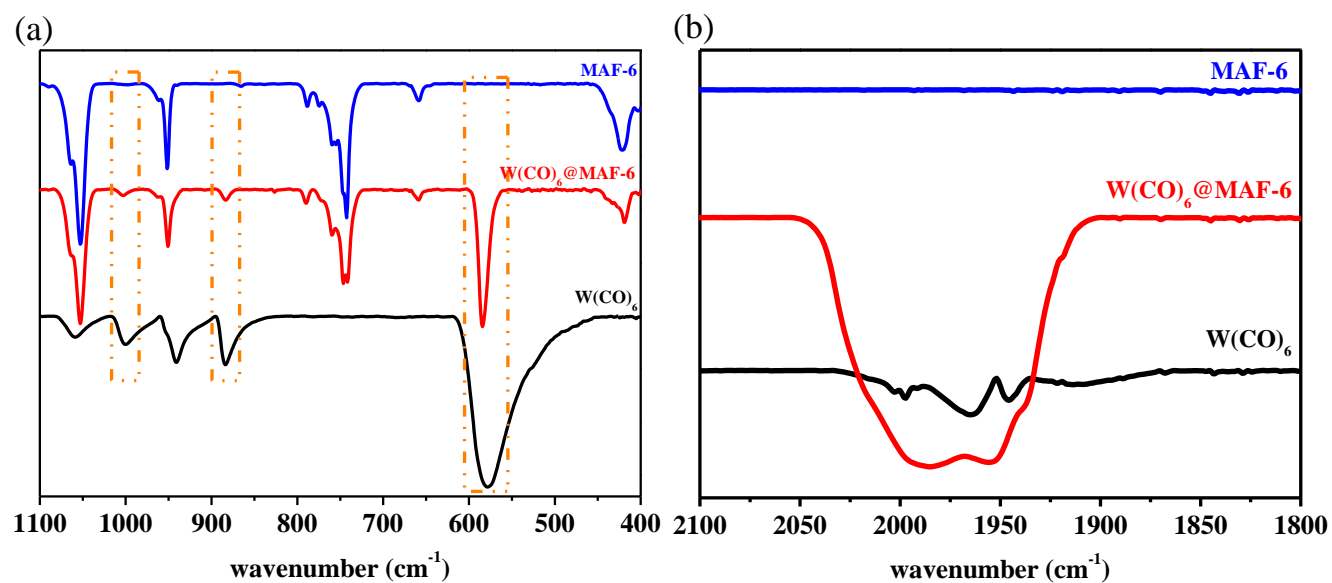

**Figure S2.** FT-IR spectra of MAF-6,  $\text{W}(\text{CO})_6$  and  $\text{W}(\text{CO})_6@MAF-6$  at (a) 400-1100  $\text{cm}^{-1}$  and (b) 1800-2100  $\text{cm}^{-1}$ .

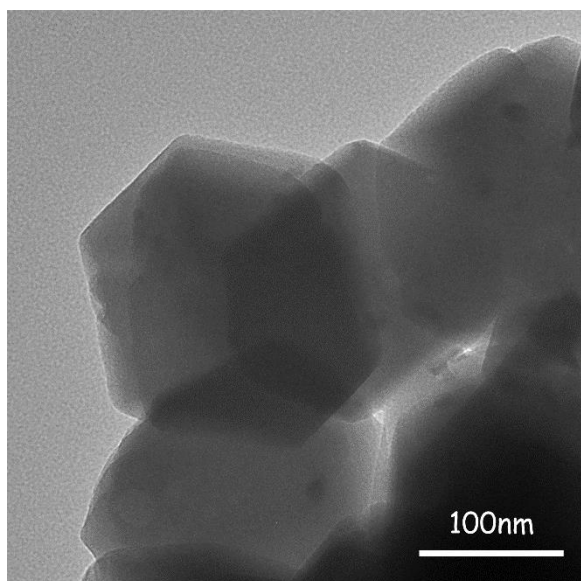

**Figure S3.** TEM image of  $\text{W(CO)}_6\text{@MAF-6}$ .

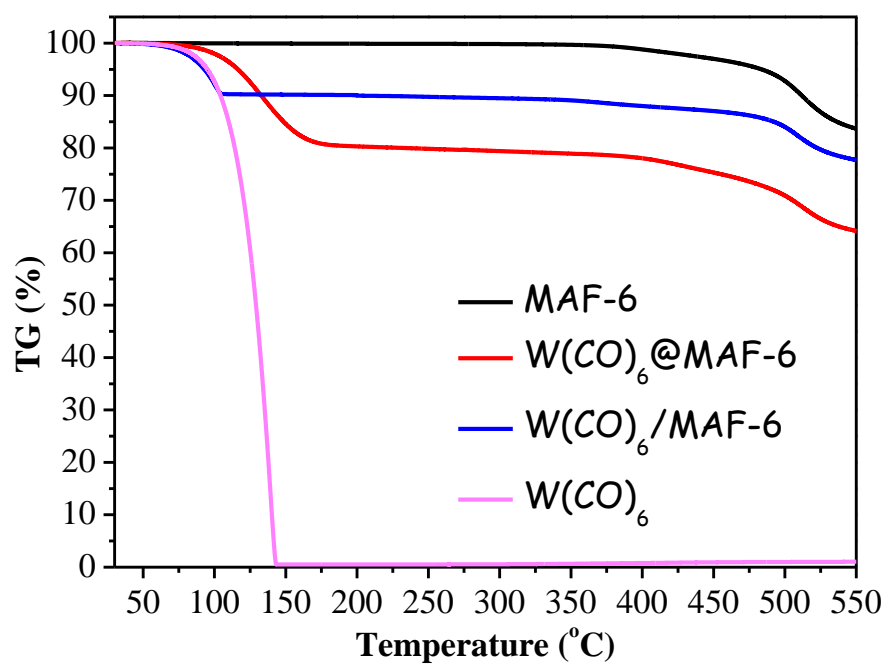

**Figure S4.** TG curves of  $\text{W(CO)}_6$ , MAF-6,  $\text{W(CO)}_6\text{@MAF-6}$  and  $\text{W(CO)}_6/\text{MAF-6}$ .

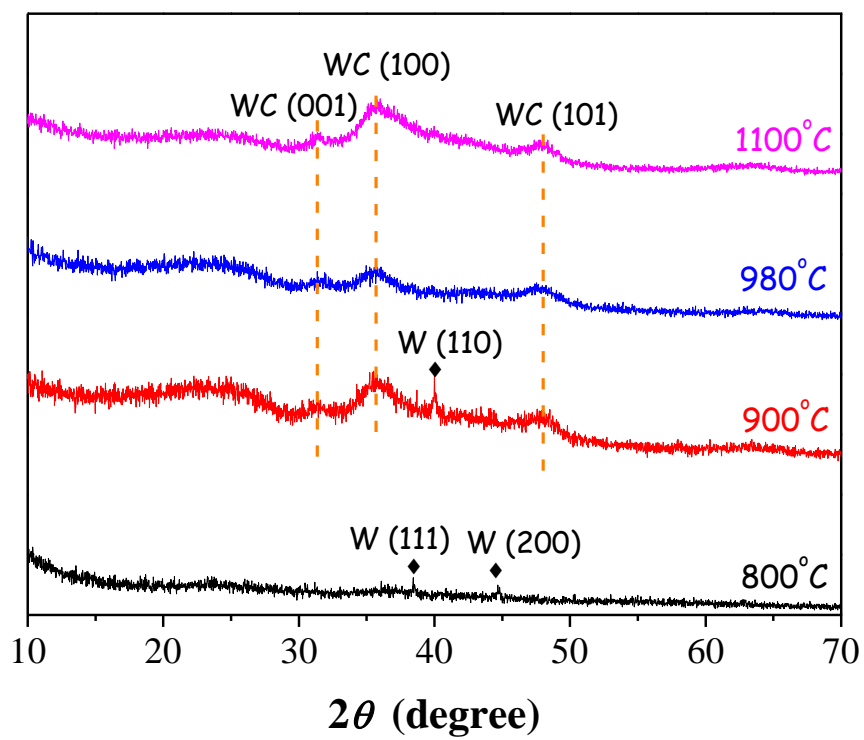

**Figure S5.** PXRD patterns of samples carbonized at different temperatures.

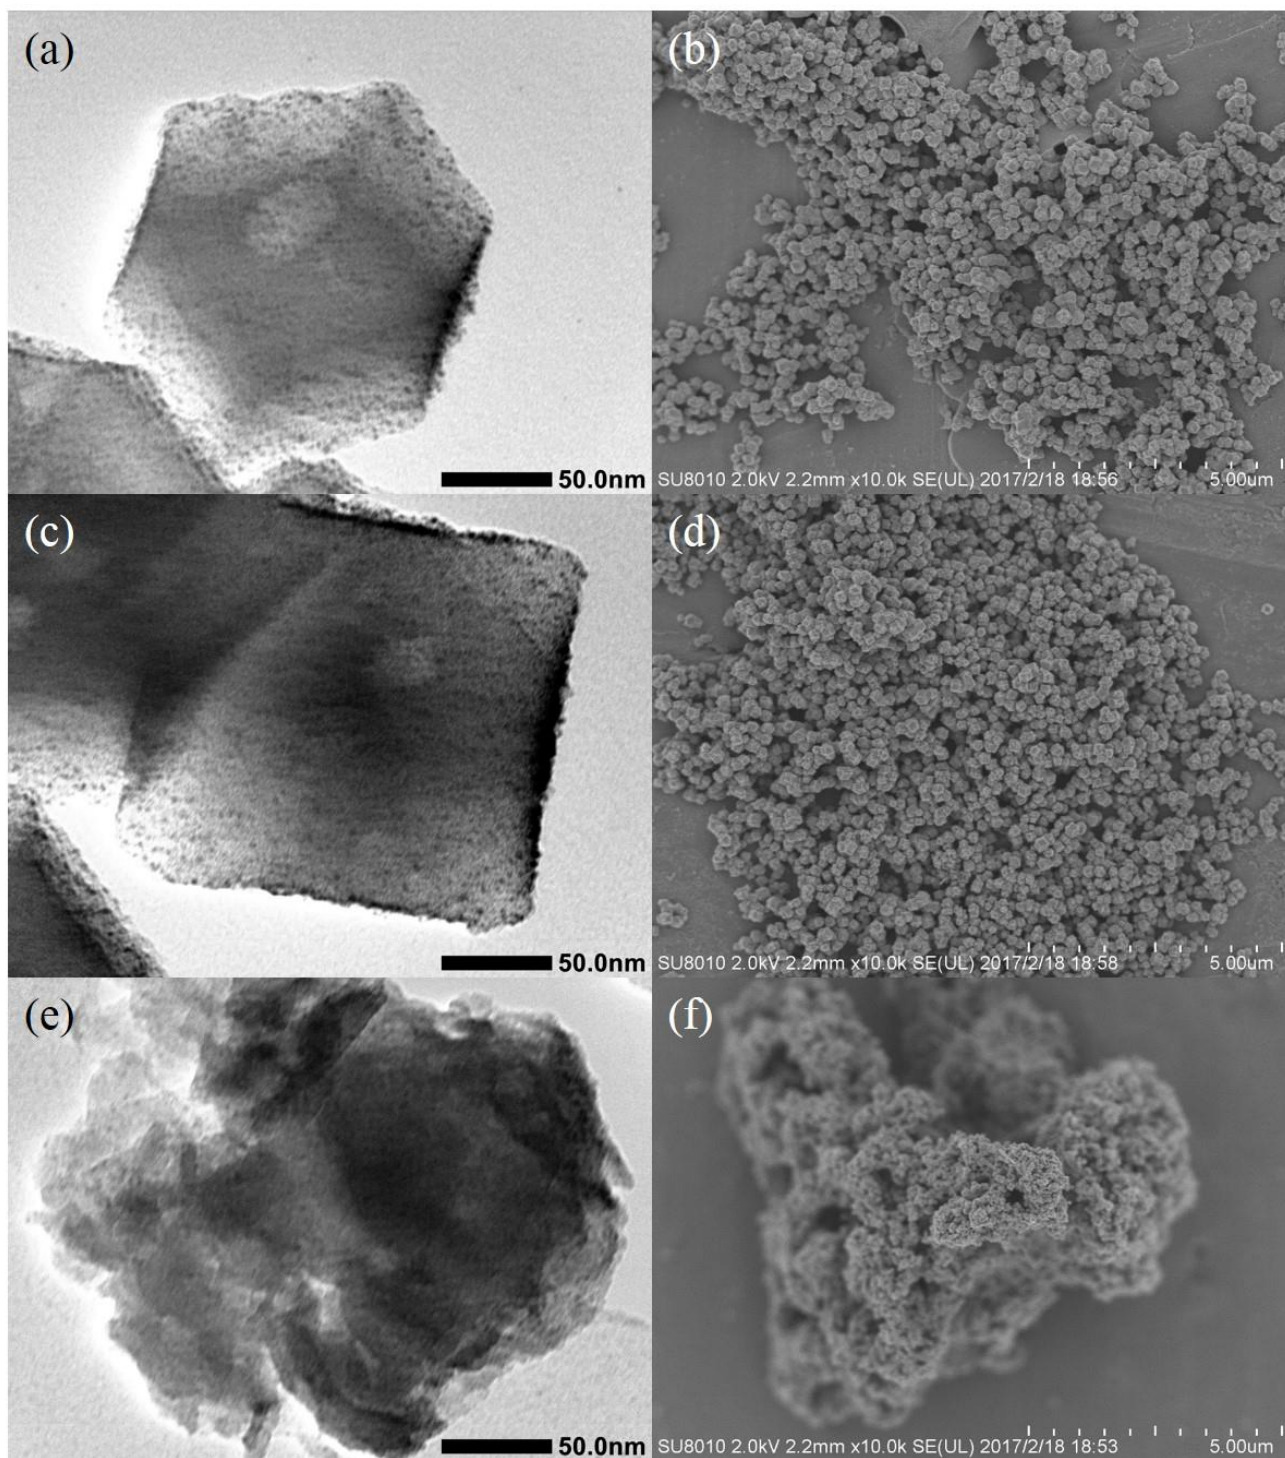

**Figure S6.** TEM and SEM images of samples carbonized at (a, b) 800 °C, (c, d) 900 °C and (e, f) 1100 °C, respectively.

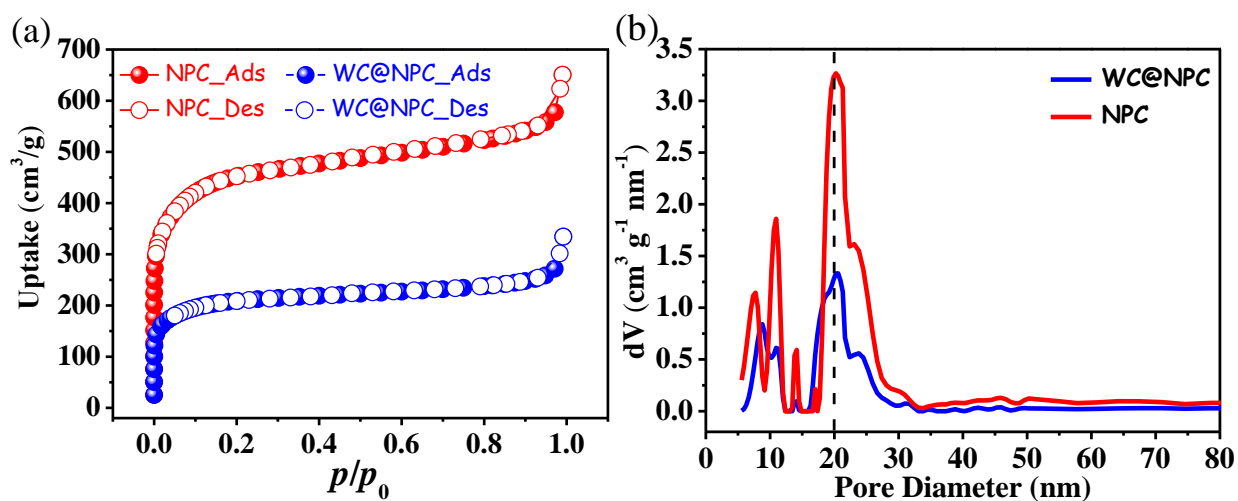

**Figure S7.** (a) 77 K N<sub>2</sub> adsorption isotherms of WC@NPC and NPC; and (b) their pore size distributions calculated by cylindrical pores model based on DFT.

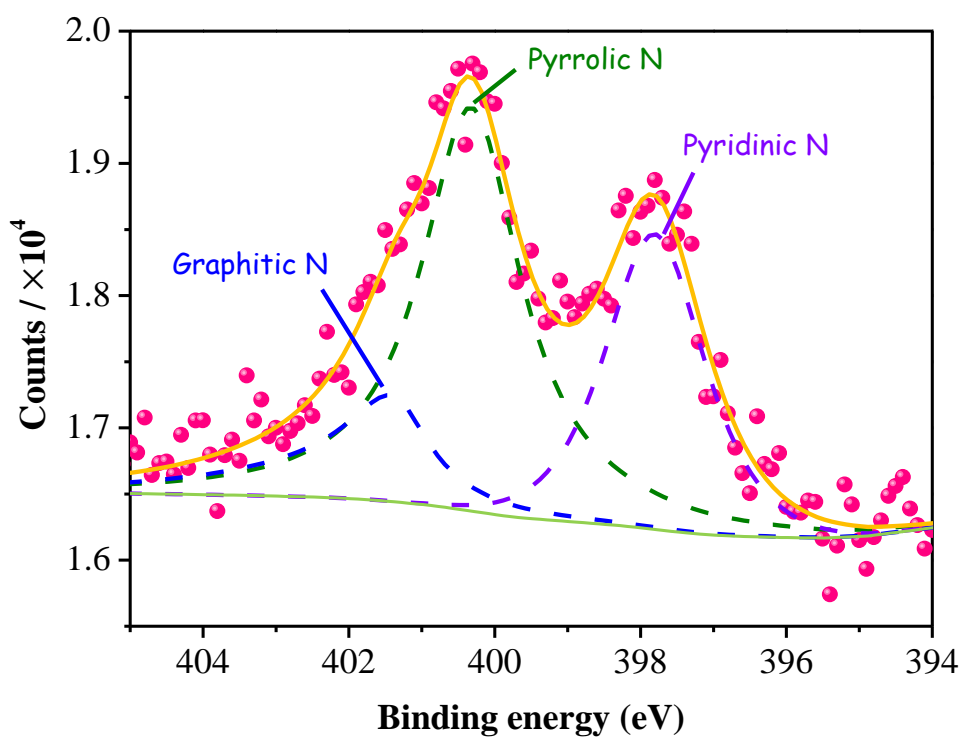

**Figure S8.** High resolution N1s XPS spectra of WC@NPC.

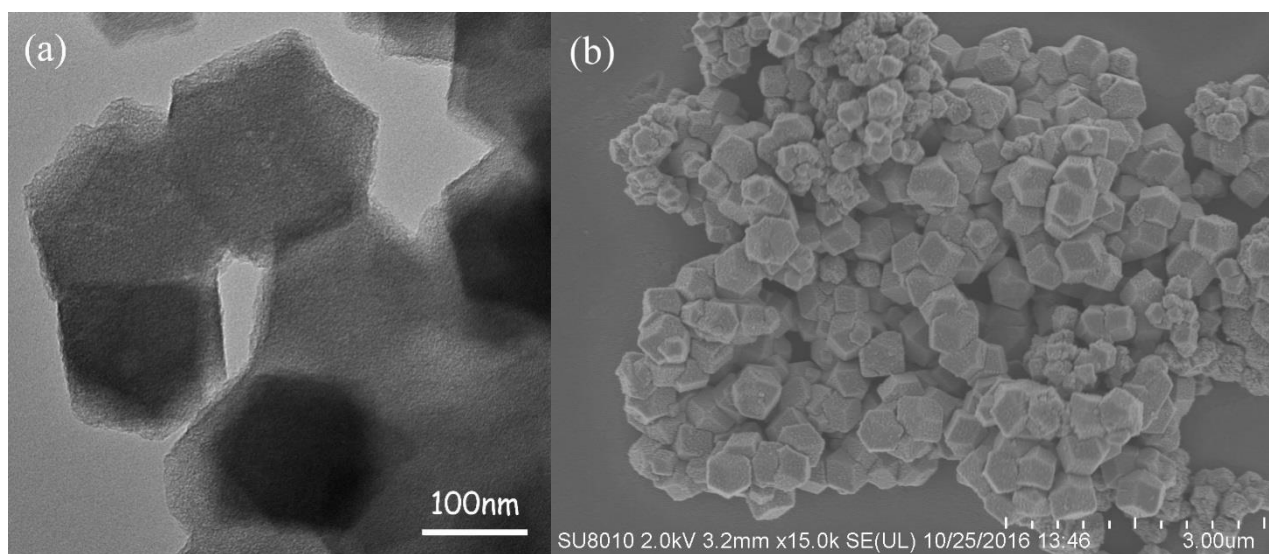

**Figure S9.** (a) TEM and (b) SEM images of NPC.

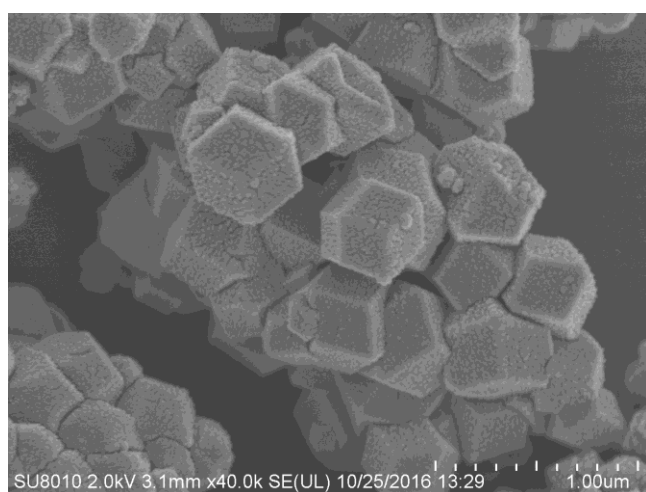

**Figure S10.** SEM image of WC@NPC

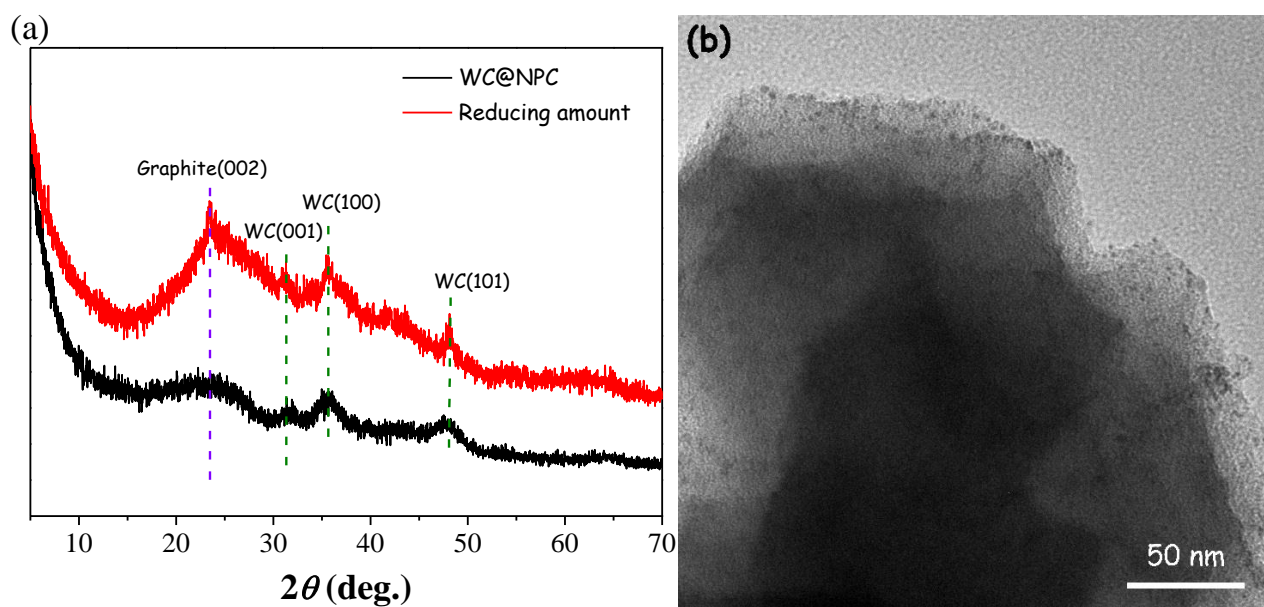

**Figure S11.** (a) PXRD pattern and (b) TEM image of the sample carbonized by the precursor with lower (9.1 wt%)  $\text{W}(\text{CO})_6$  loading amount.

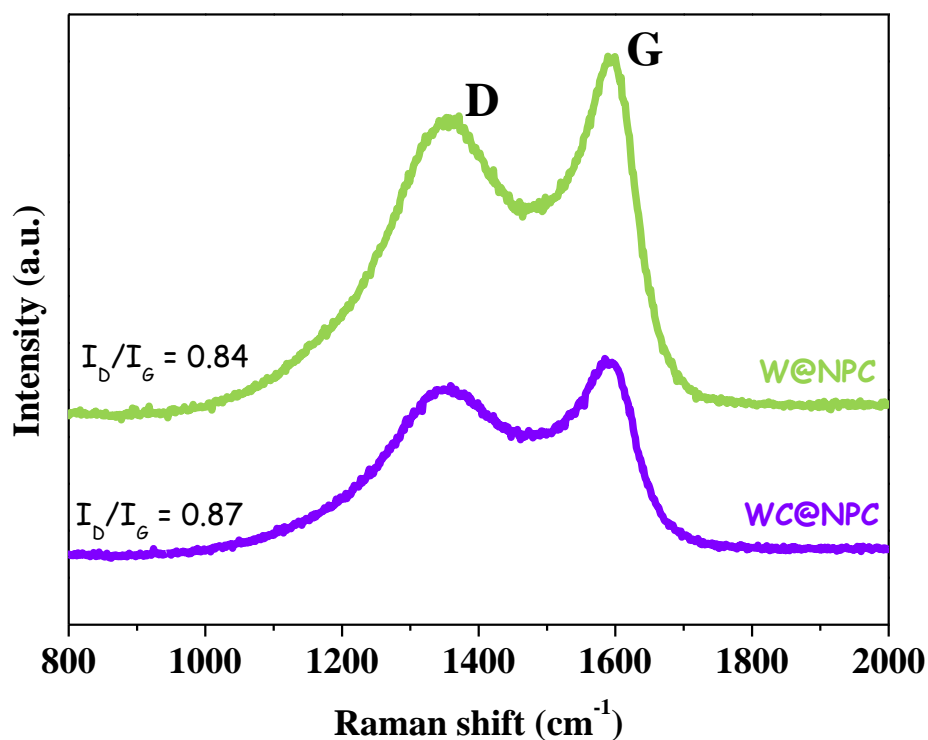

**Figure S12.** Raman spectra of W@NPC and WC@NPC. There are 2 peaks located at 1350 and 1600  $\text{cm}^{-1}$ , corresponding to D (from in-plane imperfections such as defects and heteroatoms of the graphitic lattice of the disordered  $\text{sp}^2$ -hybridized carbon) and G (from the tangential stretching mode of highly ordered pyrolytic graphite) bands, respectively. The tiny differences between the values of  $I_D/I_G$  demonstrate their similar graphitic degree, which indicates that the variety of HER catalytic activity was not led by conductivity differences.

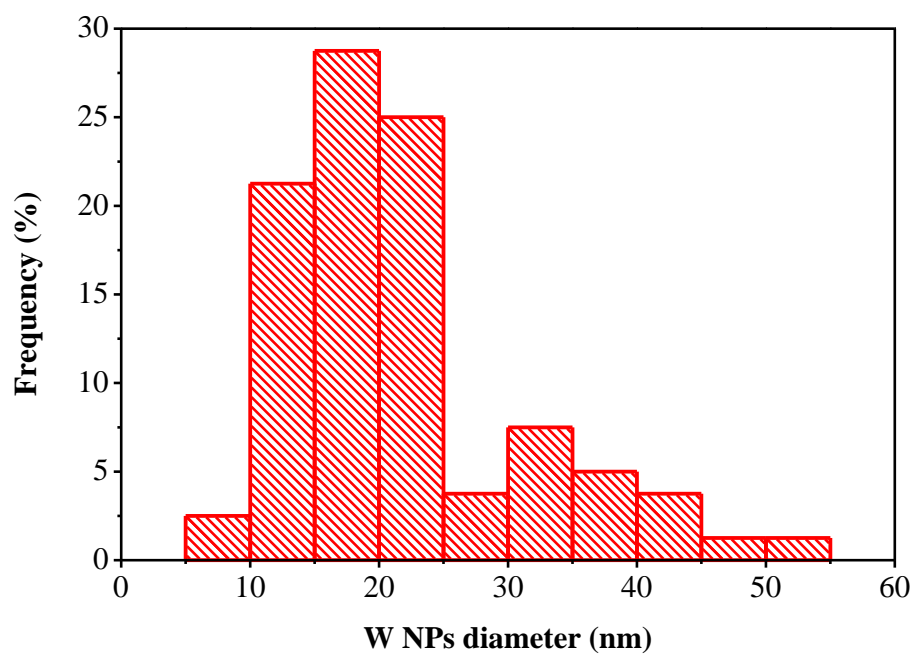

**Figure S13.** Particle size distribution of W in W@NPC.

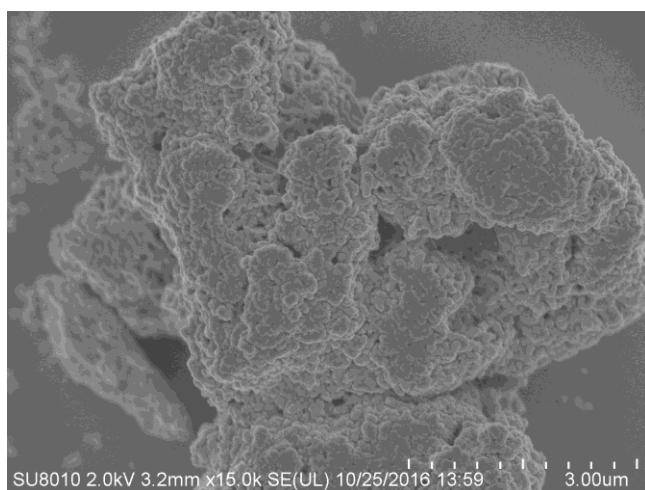

**Figure S14.** SEM images of W@NPC.

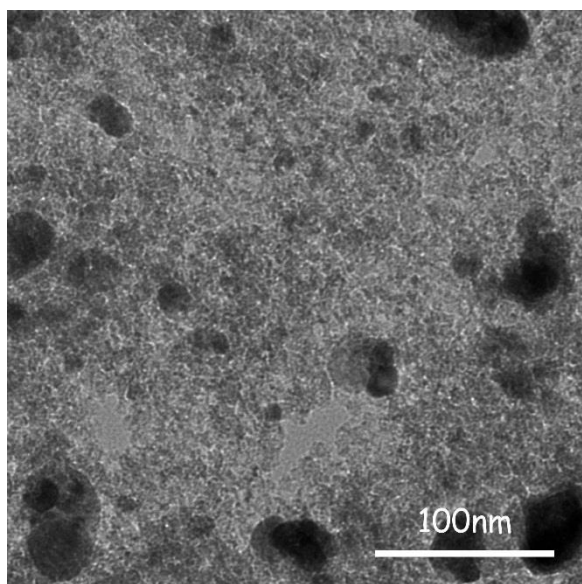

**Figure S15.** TEM image of W@NPC.

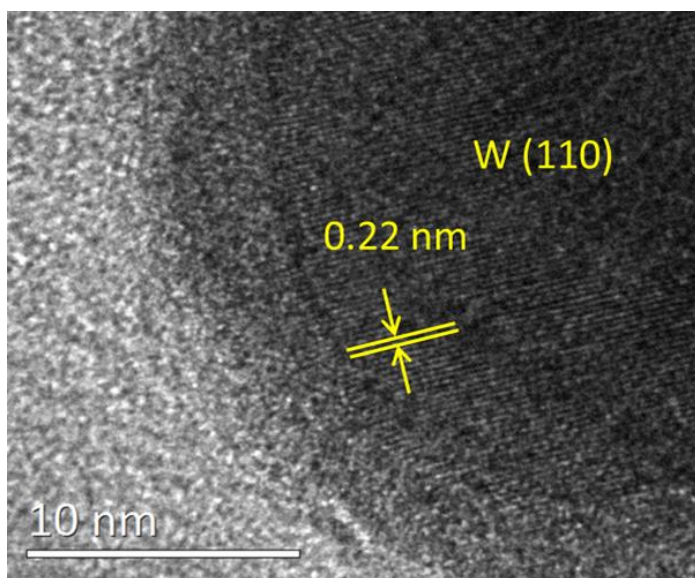

**Figure S16.** HRTEM image of W@NPC.

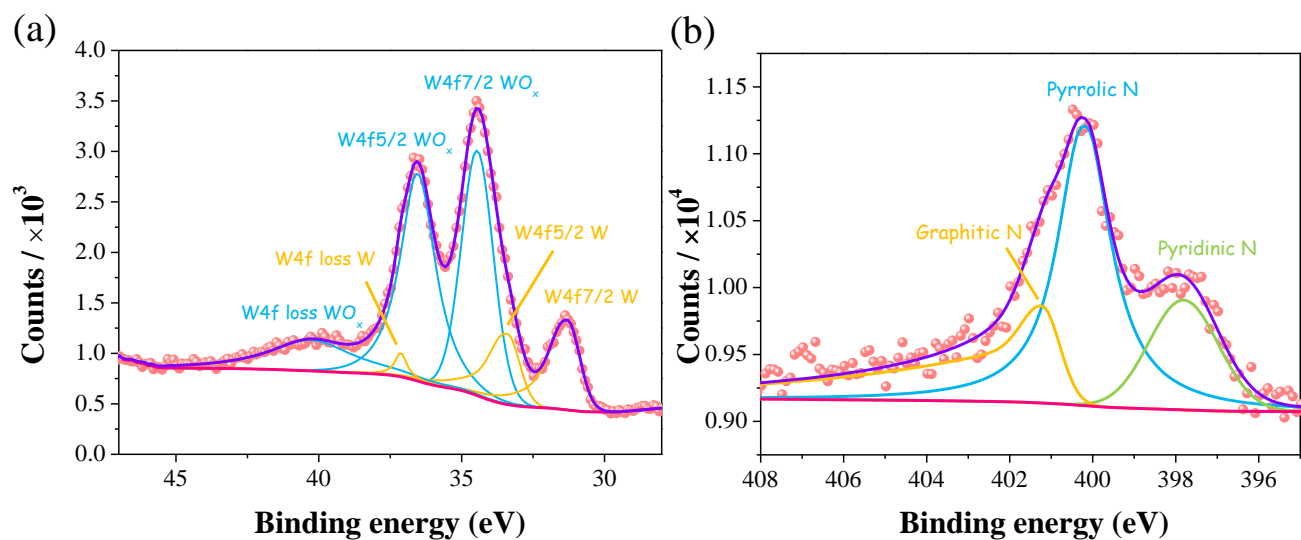

**Figure S17.** High resolution (a) W4f and (b) N1s XPS spectra of W@NPC.

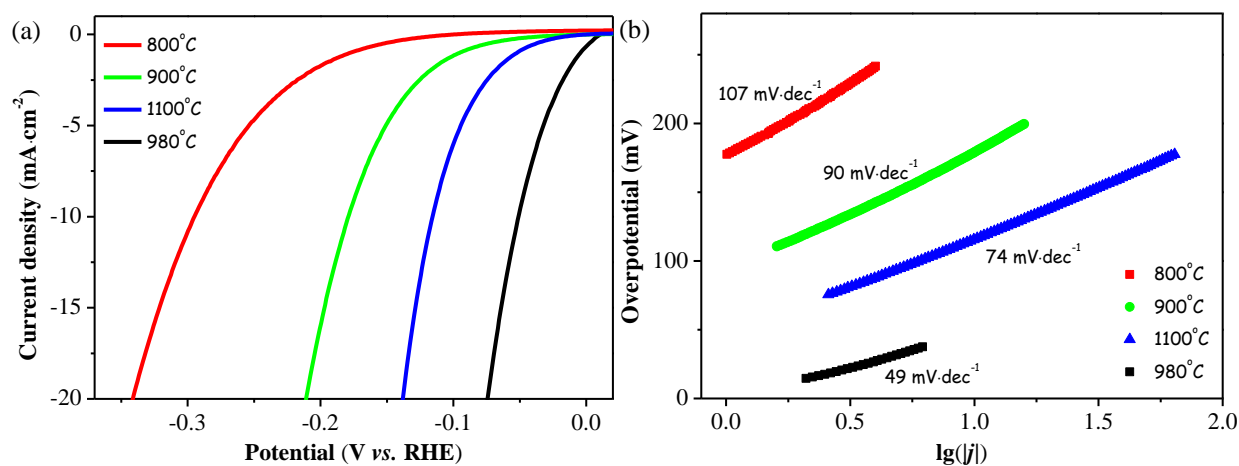

**Figure S18.** (a) HER polarization and (b) Tafel curves of samples carbonized at different temperatures.

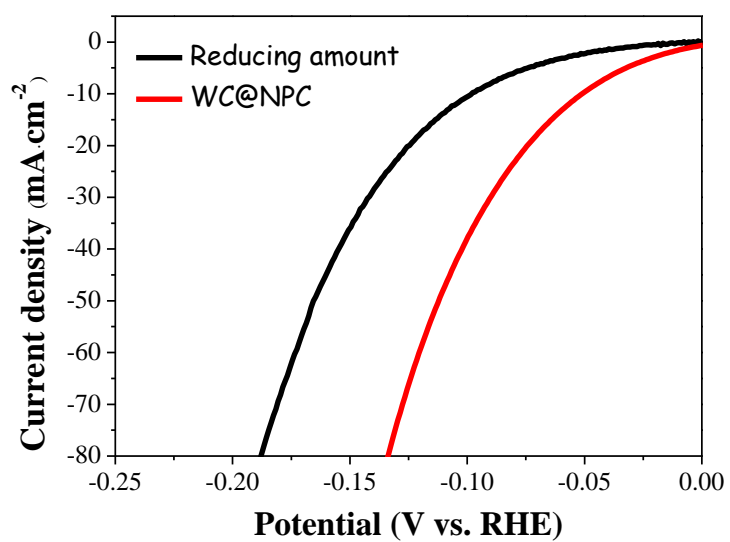

**Figure S19.** LSV curves of the titled material WC@NPC and that carbonized by reducing loading amount of  $W(CO)_6$  from 23 wt% to 9.1 wt%.

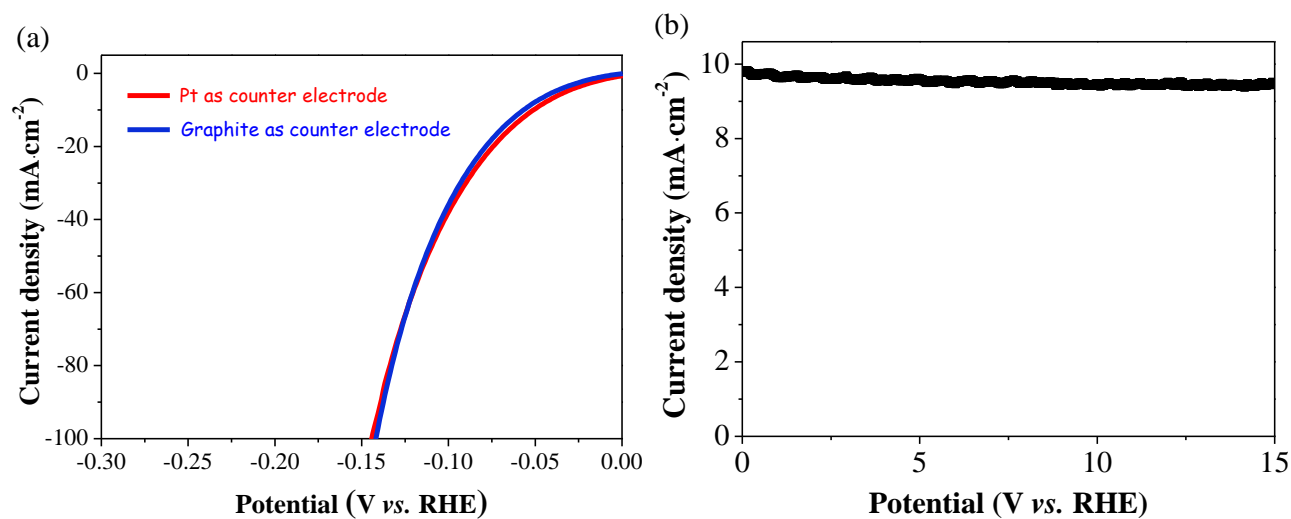

**Figure S20.** (a) LSV and (b)  $i$ - $t$  curves of WC@NPC by using graphite as counter electrode.

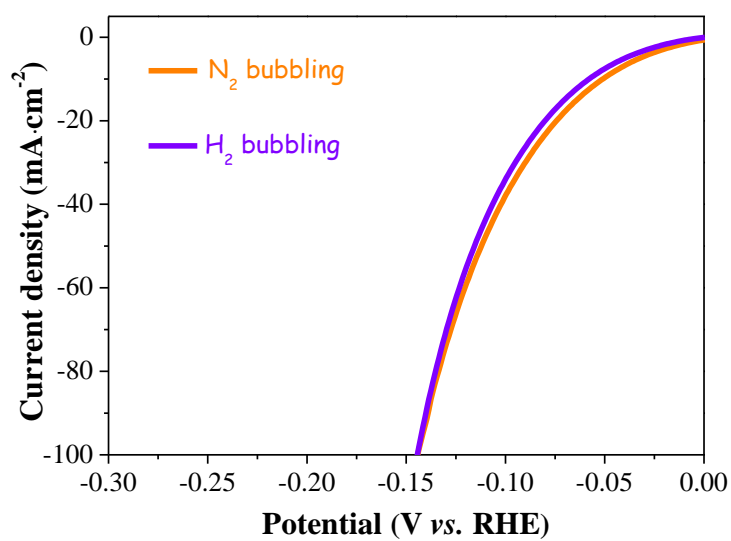

**Figure S21.** LSV curves of WC@NPC with  $\text{N}_2/\text{H}_2$  bubbled electrolyte in 0.5 M  $\text{H}_2\text{SO}_4$ .

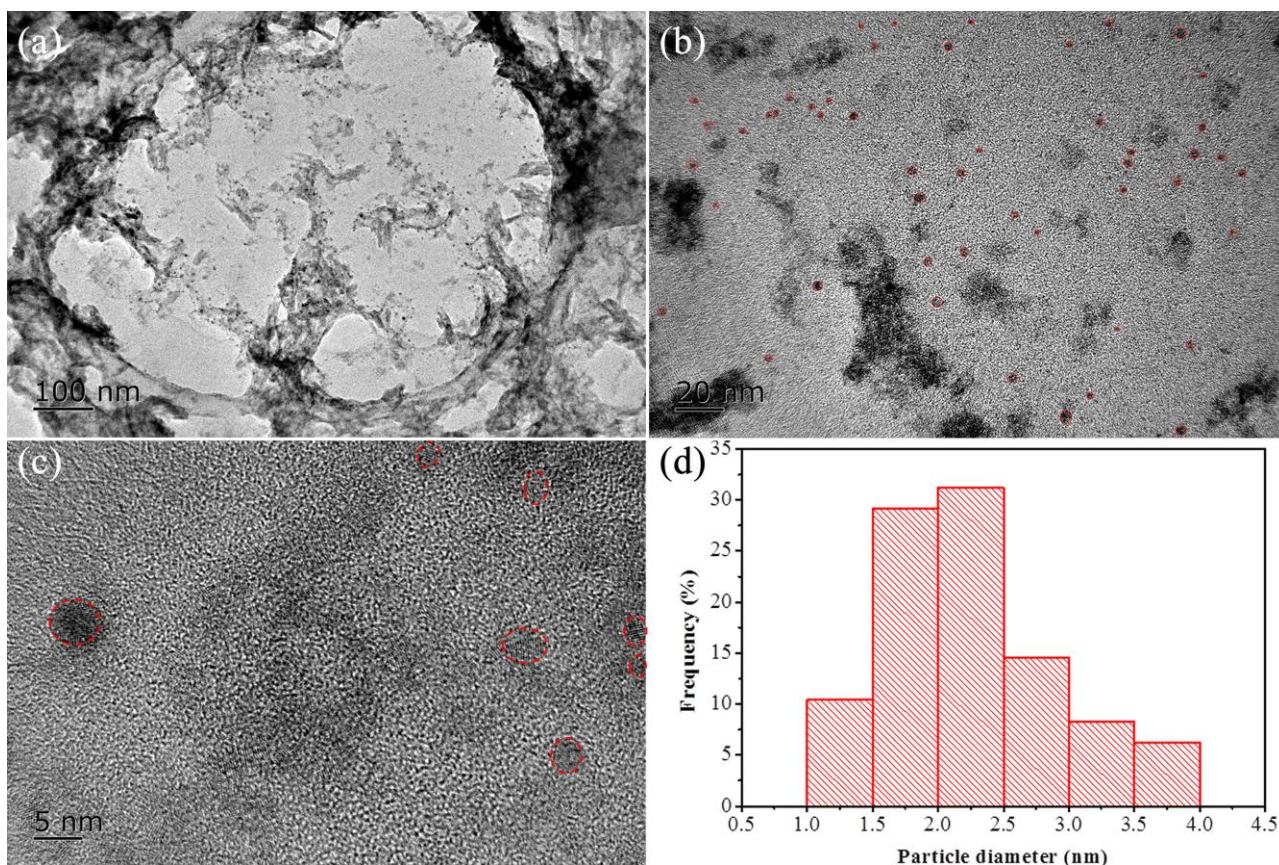

**Figure S22.** (a, b) TEM, (c) HRTEM images and (d) particle size distribution of WC@NPC after 5-hour HER catalysis.

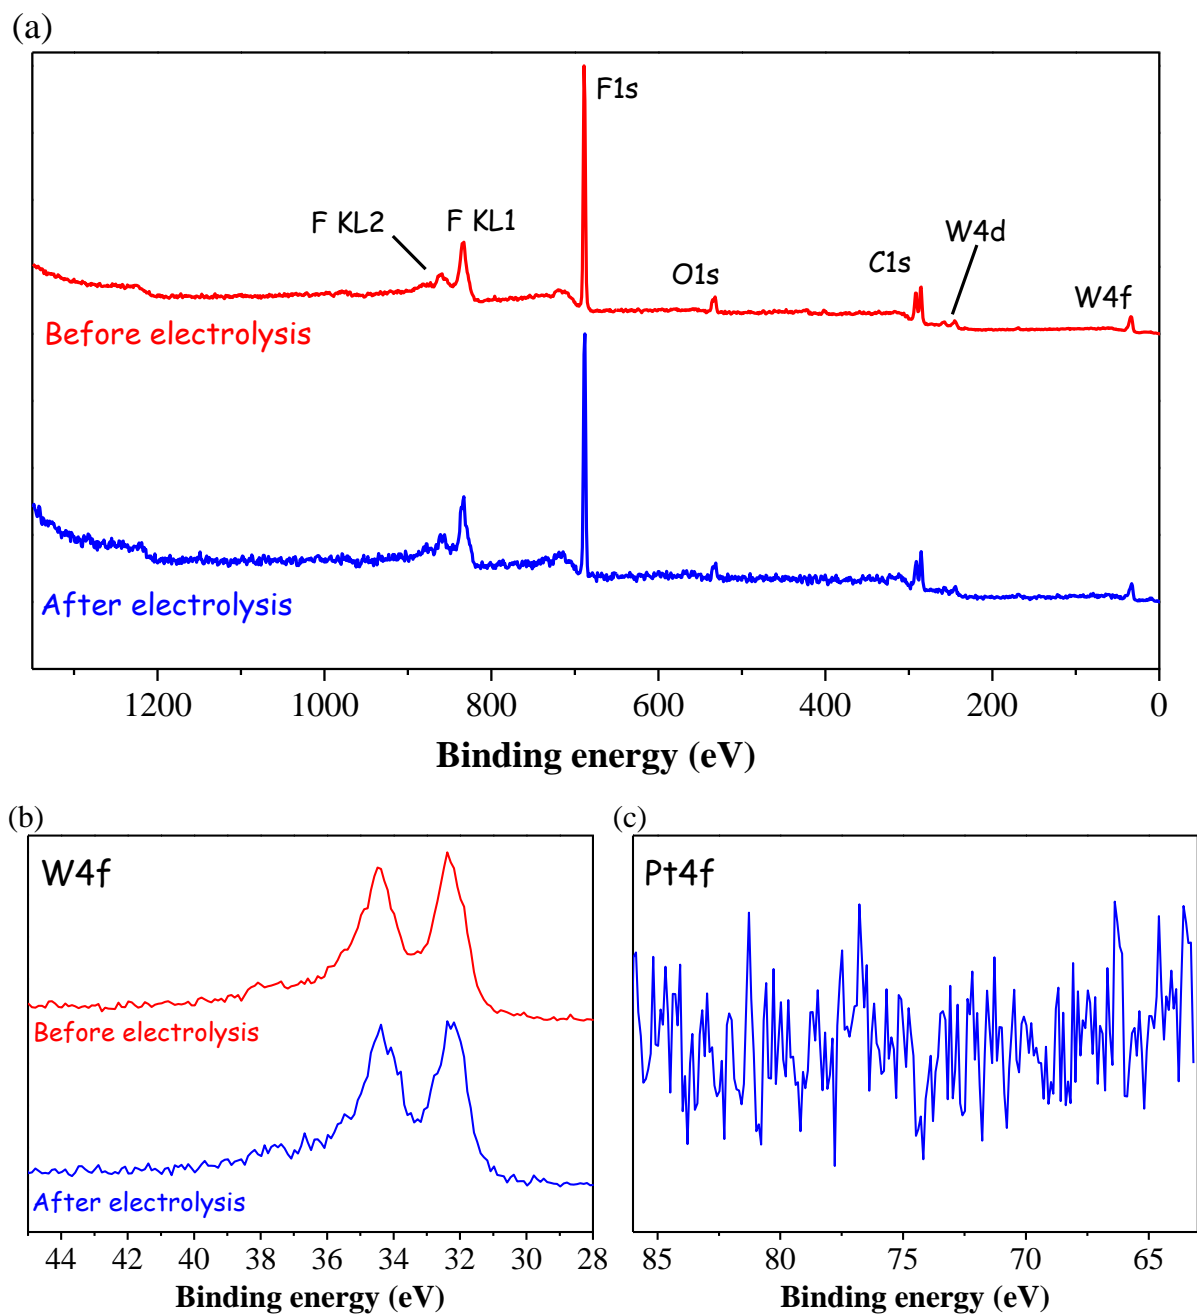

**Figure S23.** XPS (a) spectra and (b) high-resolution W4f spectra of WC@NPC on the electrode surface before and after HER electrolysis, and (c) high-resolution Pt4f spectrum after electrolysis, which excluded the possibility of Pt deposition during HER. Note: F signals were from Nafion.

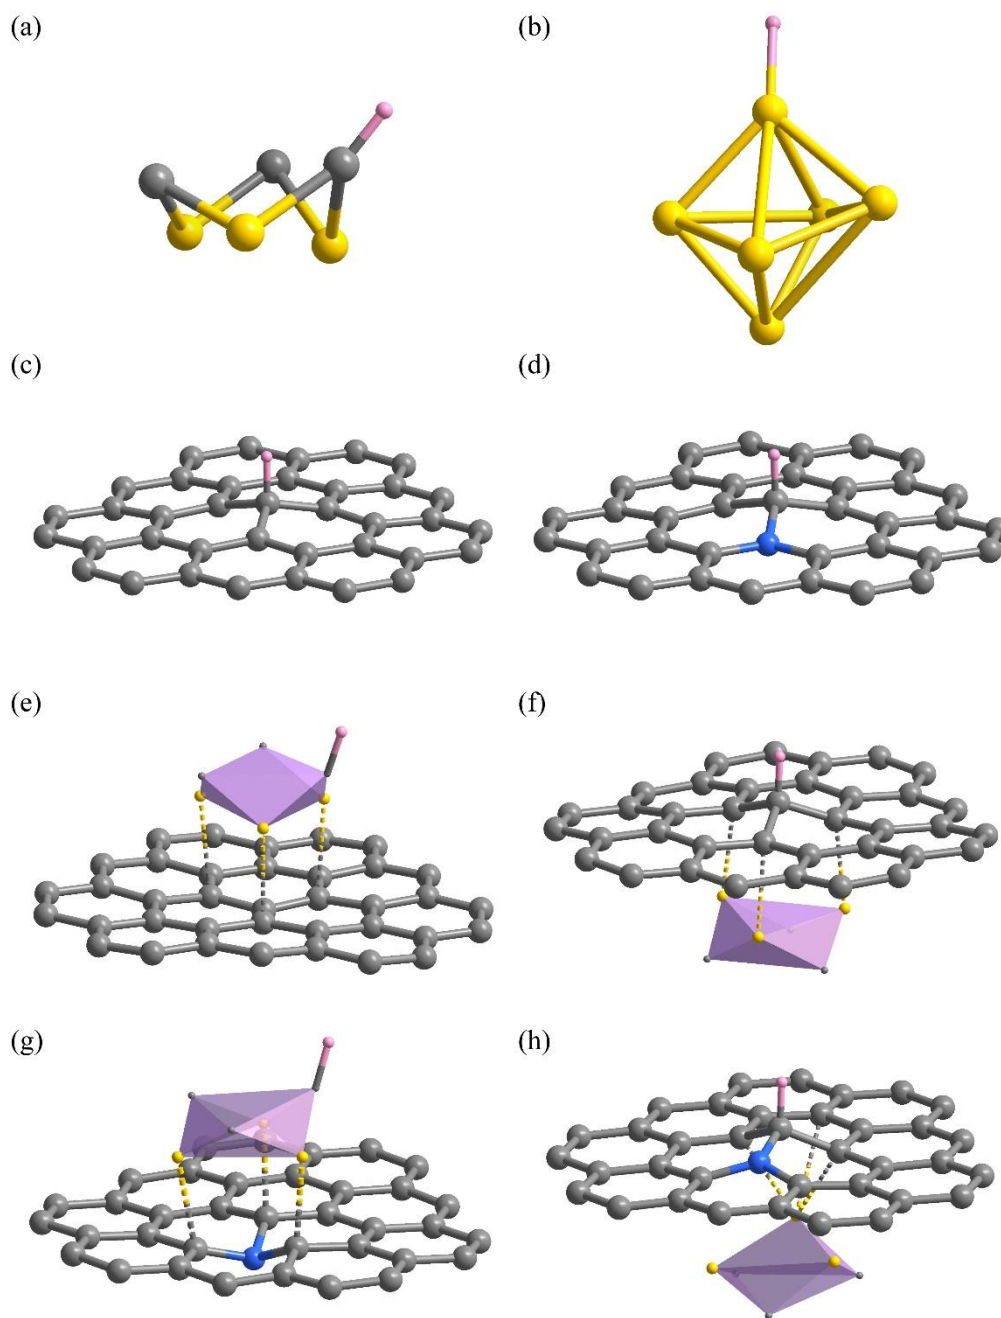

**Figure S24.** The optimized models of  $H^*$  adsorption on (a) WC ( $W_3C_3$  cluster), (b) W ( $W_6$  cluster), (c) graphene (Graphene), (d) *N*-doping graphene (*N*-Graphene), (e) the metal side (WC@Gra\_WC) and (f) graphene side (WC@Gra\_Gra) of WC bonded on graphene (WC@Gra), and (g) the metal side (WC@N-Gra\_WC) and (h) graphene side (WC@N-Gra\_Gra) of WC bonded on *N*-doping graphene (WC@N-Gra) for DFT calculations. (Gray: C; blue: N; gold: W; pink: H)

**Table S1.** Comparison of Molybdenum / Tungsten carbides particle sizes and synthesis methods.

| Composite                                          | Size / nm   | Synthesis method                                                                                                                                   | Ref.                                                |
|----------------------------------------------------|-------------|----------------------------------------------------------------------------------------------------------------------------------------------------|-----------------------------------------------------|
| WC@NPC                                             | 2           | Cage-confinement pyrolysis at 980°C                                                                                                                | This work                                           |
| $\beta$ -Mo <sub>0.06</sub> W <sub>0.94</sub> C/CB | most of 1-4 | SiO <sub>2</sub> -assisted carburization at 900°C                                                                                                  | <i>Angew. Chem. Int. Ed.</i> <b>2014</b> , 53, 5131 |
| WC                                                 | micro-scale | Carburization of LiCl/KCl/KF/W/MWCNT at 950°C                                                                                                      | <i>J. Mater. Chem. A</i> , <b>2015</b> , 3, 10085   |
| WC                                                 | ~40nm       | Carburization with CH <sub>4</sub> /H <sub>2</sub> at 800°C                                                                                        | <i>Chem. Commun.</i> , <b>2013</b> , 49, 4884       |
| WC                                                 | micro-scale | Carburization of WO <sub>3</sub> /carbon black at 1300°C                                                                                           | <i>Chem. Commun.</i> , <b>2012</b> , 48, 1063       |
| PdFe-WC/C                                          | 4.1         | intermittent microwave heating (IMH) method                                                                                                        | <i>Energy Environ. Sci.</i> , <b>2011</b> , 4, 558  |
| W <sub>2</sub> C/WC/WN mixture                     | 5-20        | Carburization of biomass precursors at 850°C                                                                                                       | <i>J. Mater. Chem. A</i> , <b>2015</b> , 3, 18572   |
| WC                                                 | 3-6         | “Urea Glass” Route (Carburization at 800°C)                                                                                                        | <i>Nano Lett.</i> , <b>2008</b> , 8, 4659           |
| WC                                                 | ~21.6       | hot filament chemical vapor deposition (HF-CVD) at 1050°C                                                                                          | <i>ACS Nano</i> , <b>2015</b> , 9, 5125             |
| $\beta$ -Ta <sub>0.3</sub> W <sub>0.7</sub> C/CB   | most of 2-3 | SiO <sub>2</sub> -assisted carburization at 900°C                                                                                                  | <i>J. Phys. Chem. C</i> , <b>2015</b> , 119, 13691  |
| WC/W <sub>2</sub> C mixture                        | 5-25        | Carburization of W-orthoester precursor with mpg-C <sub>3</sub> N <sub>4</sub> above 800°C                                                         | <i>ChemSusChem</i> , <b>2013</b> , 6, 168           |
| Pt-WC <sub>THP</sub> /G                            | 3-9         | Microwave assisted synthesis                                                                                                                       | <i>Nano Energy</i> , <b>2014</b> , 8, 52            |
| WC/CNT                                             | 200         | Carburization of (NH <sub>4</sub> ) <sub>6</sub> H <sub>2</sub> W <sub>12</sub> O <sub>40</sub> /CNT with CH <sub>4</sub> /H <sub>2</sub> at 900°C | <i>Electrochim. Acta</i> , <b>2007</b> , 52, 2018   |
| WC <sub>1-x</sub> /Pt/MWNT                         | 7.5         | Sonochemical method and carburization at 450°C                                                                                                     | <i>J. Power Sources</i> , <b>2009</b> , 193, 441    |

|                                                                   |             |                                                                                                                                                       |                                                      |
|-------------------------------------------------------------------|-------------|-------------------------------------------------------------------------------------------------------------------------------------------------------|------------------------------------------------------|
| WC/W <sub>2</sub> C mixture                                       | 1.9±0.9     | Modified arc-discharge method at CH <sub>4</sub> atmosphere                                                                                           | <i>Nano Energy</i> , <b>2016</b> , 28, 261           |
| Pt/TiWC                                                           | 3           | SiO <sub>2</sub> -assisted carburization at 900°C                                                                                                     | <i>Science</i> , 2016, 352, 974                      |
| W <sub>2</sub> C/WN mixture                                       | 11/2.9      | Carburization of ammonium tungstate/graphene/aniline at 900°C                                                                                         | <i>ChemSusChem</i> <b>2014</b> , 7, 2414             |
| Co <sub>6</sub> W <sub>6</sub> C                                  | 5-20        | Carburization of dicyandiamide/Co(NO <sub>3</sub> ) <sub>2</sub> /(NH <sub>4</sub> ) <sub>2</sub> WO <sub>4</sub> at 700°C                            | <i>Nanoscale</i> , <b>2015</b> , 7, 3130             |
| Fe-WC/WN mixture                                                  | 10-20       | Carburization of polydiaminopyridine/H <sub>2</sub> WO <sub>4</sub> /Fe(NO <sub>3</sub> ) <sub>3</sub> at 700°C                                       | <i>Angew. Chem. Int. Ed.</i> <b>2013</b> , 52, 13638 |
| WC                                                                | 20          | High-energy ball milling                                                                                                                              | <i>Inorg. Mater.</i> , <b>2009</b> , 45, 380         |
| W <sub>2</sub> C                                                  | most of 2-5 | Carburization at 800°C with low pressure 320 Pa                                                                                                       | <i>Nat. Commun.</i> , <b>2016</b> , 7, 16216         |
| $\beta$ -Mo <sub>2</sub> C/ $\eta$ -MoC mixture                   | 8           | Carburization of POM-MOF at 800°C                                                                                                                     | <i>Chem. Mater.</i> <b>2016</b> , 28, 6313           |
| N, P-doped Mo <sub>2</sub> C@C                                    | 8.5         | Carburization of phosphomolybdic acid/polypyrrole at 800°C                                                                                            | <i>ACS Nano</i> <b>2016</b> , 10, 8851               |
| Mo <sub>2</sub> C                                                 | 5-20        | Carburization of (NH <sub>4</sub> ) <sub>6</sub> Mo <sub>7</sub> O <sub>24</sub> ·4H <sub>2</sub> O/dicyandiamide at 800°C                            | <i>ACS Nano</i> <b>2016</b> , 10, 10397              |
| Mo <sub>2</sub> C/MoO <sub>2</sub> /MoO <sub>3</sub> /MoN mixture | 1-3         | Carburization of (NH <sub>4</sub> ) <sub>6</sub> Mo <sub>7</sub> O <sub>24</sub> ·4H <sub>2</sub> O/dicyandiamide with 2-step heating (400 and 800°C) | <i>Angew. Chem. Int. Ed.</i> <b>2015</b> , 54, 14723 |
| Mo <sub>2</sub> C/CNT                                             | 7-15        | Carburization of carbon-supported (NH <sub>4</sub> ) <sub>6</sub> Mo <sub>7</sub> O <sub>24</sub> ·4H <sub>2</sub> O at 800°C                         | <i>Energy Environ. Sci.</i> , <b>2013</b> , 6, 943   |
| MoS <sub>2</sub> /Mo <sub>2</sub> C-NCNTs mixture                 | 135         | Carburization MoO <sub>3</sub> /PANI at 700°C                                                                                                         | <i>J. Mater. Chem. A</i> , <b>2014</b> , 2, 18715    |
| MoC <sub>x</sub> /C                                               | 5-50        | Carburization of polyoxometalate-encapsulated                                                                                                         | <i>J. Mater. Chem. A</i> ,                           |

|                                                                 |       |                                                                                                                                                    |                                                     |
|-----------------------------------------------------------------|-------|----------------------------------------------------------------------------------------------------------------------------------------------------|-----------------------------------------------------|
|                                                                 |       | coordination polymer at 800°C                                                                                                                      | <b>2016</b> , 4, 3947                               |
| Mo <sub>2</sub> C/MoN/MoO <sub>3</sub> mixture                  | 20-30 | CO <sub>2</sub> emission assisted pyrolyzed at 800 °C                                                                                              | <i>J. Am. Chem. Soc.</i><br><b>2015</b> , 137, 110  |
| Mo <sub>2</sub> C                                               | 11    | Urea glass route                                                                                                                                   | <i>J. Mater. Chem. A</i> ,<br><b>2015</b> , 3, 8361 |
| $\eta$ -MoC/ $\eta$ -MoC <sub>1-x</sub> mixture                 | 4-10  | Carburization of MOF (NENU-5) at 800°C                                                                                                             | <i>Nat. Commun.</i> ,<br><b>2015</b> , 6, 6512;     |
| $\beta$ -Mo <sub>2</sub> C/ $\gamma$ -Mo <sub>2</sub> N mixture | 10-20 | Carburization of biomass precursors at 800°C                                                                                                       | <i>Energy Environ. Sci.</i> , <b>2013</b> , 6, 1818 |
| Mo <sub>2</sub> C/NCF                                           | 3     | Self-polymerization of dopamine with (NH <sub>4</sub> ) <sub>6</sub> Mo <sub>7</sub> O <sub>24</sub> ·4H <sub>2</sub> O and carburization at 750°C | <i>ACS Nano</i> , <b>2016</b> , 10, 11337           |

**Table S2.** Analytical results of elemental containing by EDS.

|                                                       | C wt% | N wt% | O wt% | W wt% | Zn wt% |
|-------------------------------------------------------|-------|-------|-------|-------|--------|
| WC@NPC                                                | 41.8  | 3.5   | 6.7   | 48.0  | 0      |
| W@NPC                                                 | 48.8  | 2.0   | 7.5   | 41.7  | 0      |
| 800°C<br>carbonization                                | 30.5  | 5.2   | 7.8   | 48.2  | 8.3    |
| 900°C<br>carbonization                                | 41.3  | 2.5   | 5.6   | 45.7  | 4.8    |
| 1100°C<br>carbonization                               | 39.4  | 3.0   | 6.1   | 51.5  | 0      |
| carbonized with<br>less W(CO) <sub>6</sub><br>loading | 57.7  | 4.4   | 8.1   | 29.8  | 0      |

**Table S3.** Comparison of HER catalytic performances of reported Mo/W-containing catalysts in 0.5 M H<sub>2</sub>SO<sub>4</sub> solution.

| Catalyst                                                                   | Loading<br>(mg<br>cm <sup>-2</sup> ) | $\eta_{10}$<br>(mV <i>vs</i><br>RHE) | $E_{\text{onset}}$<br>(mV <i>vs</i><br>RHE) | Tafel<br>slop<br>(mV<br>dec <sup>-1</sup> ) | $j_0$<br>(mA<br>cm <sup>-2</sup> ) | Reference                                                 |
|----------------------------------------------------------------------------|--------------------------------------|--------------------------------------|---------------------------------------------|---------------------------------------------|------------------------------------|-----------------------------------------------------------|
| WC@NPC                                                                     | 0.209                                | 51                                   | 0                                           | 49                                          | 2.4                                | This work                                                 |
| W@NPC                                                                      | 0.209                                | 233<br>(@2 mA<br>cm <sup>-2</sup> )  | 28                                          | 191                                         | 1×10 <sup>-4</sup>                 | This work                                                 |
| 20% Pt/C                                                                   | 0.209                                | 30                                   | 0                                           | 22                                          | 1.2                                | This work                                                 |
| $\beta$ -Mo <sub>0.06</sub> W <sub>0.94</sub> C/CB                         | 0.704                                | 220                                  | N/A                                         | N/A                                         | N/A                                | <i>Angew. Chem. Int. Ed.</i> ,<br><b>2014</b> , 53, 5131  |
| $\alpha$ -WC/CB                                                            | 0.704                                | 256                                  | N/A                                         | N/A                                         | N/A                                |                                                           |
| WSoy <sub>0.7</sub> GP <sub>1.0</sub><br>(WC/W <sub>2</sub> C/WN/Graphene) | 2.2                                  | 105                                  | N/A                                         | 36                                          | 0.063                              | <i>J. Mater. Chem. A</i> , <b>2015</b> ,<br>3, 18572      |
| porous WC film                                                             | 0.16                                 | 275                                  | 120                                         | 69                                          | N/A                                | <i>J. Mater. Chem. A</i> , <b>2015</b> ,<br>3, 5798       |
| porous WS <sub>2</sub> film                                                | 0.08                                 | 265                                  | 100                                         | 67                                          | N/A                                |                                                           |
| WC-1050                                                                    | N/A                                  | 145                                  | 15                                          | 72                                          | N/A                                | <i>ACS Nano</i> , <b>2015</b> , 9, 5125                   |
| $\beta$ -Ta <sub>0.3</sub> W <sub>0.7</sub> C/CB                           | 0.704                                | 242                                  | 100                                         | 72                                          | N/A                                | <i>J. Phys. Chem. C</i> , <b>2015</b> ,<br>119, 13691     |
| Fe-WCN                                                                     | 0.4                                  | 220                                  | N/A                                         | 47                                          | N/A                                | <i>Angew. Chem. Int. Ed.</i> ,<br><b>2013</b> , 52, 13638 |
| C-CWC                                                                      | 0.28                                 | 200                                  | 26                                          | 75                                          | 0.0286                             | <i>Nanoscale</i> , <b>2015</b> , 7, 3130                  |
| MoS <sub>2</sub> /WC/RGO                                                   | 0.104                                | 202                                  | 110                                         | 41                                          | N/A                                | <i>Chem. Commun.</i> , <b>2013</b> ,<br>49, 4884          |
| W <sub>2</sub> C-1073                                                      | 1                                    | 190                                  | 130                                         | 102                                         | 0.28                               | <i>ChemSusChem</i> , <b>2013</b> , 6,<br>168              |
| WC-1223                                                                    | 1                                    | 150                                  | 190                                         | 84                                          | 0.35                               |                                                           |
| W <sub>2</sub> C/GnP                                                       | 2.2                                  | 186                                  | N/A                                         | 64.7                                        | 0.024                              | <i>ChemSusChem</i> , <b>2014</b> , 7,<br>2414             |
| W <sub>0.5</sub> Ani/GnP                                                   | 0.96                                 | 120                                  | N/A                                         | 68.6                                        | 0.038                              |                                                           |

|                                                      |       |                                       |     |      |       |                                                        |
|------------------------------------------------------|-------|---------------------------------------|-----|------|-------|--------------------------------------------------------|
| W <sub>2</sub> C/MWNT                                | 0.56  | 123                                   | 50  | 45   | N/A   | <i>Nat. Commun.</i> , <b>2016</b> , 7, 13216           |
| P-WN/rGO                                             | 0.337 | 85                                    | 46  | 54   | 0.35  | <i>Angew. Chem. Int. Ed.</i> , <b>2015</b> , 54, 6325  |
| WP <sub>2</sub> SMPs                                 | 0.5   | 161                                   | 54  | 57   | 0.017 | <i>ACS Catal.</i> , <b>2015</b> , 5, 145               |
| WSe <sub>2</sub> nanofilm                            | N/A   | 300                                   | N/A | 77.4 | N/A   | <i>Nano Lett.</i> , <b>2013</b> , 13, 3426             |
| WS <sub>2</sub> @P,N, O-graphene                     | 0.113 | 125                                   | N/A | 52.7 | 0.131 | <i>Adv. Mater.</i> , <b>2015</b> , 27, 4234            |
| MWCMNs(WO <sub>2</sub> )                             | 0.35  | 58                                    | 35  | 46   | 0.64  | <i>J. Am. Chem. Soc.</i> , <b>2015</b> , 137, 6983     |
| W <sub>18</sub> O <sub>49</sub> @WS <sub>2</sub> NRs | 0.3   | 310                                   | 170 | 86   | N/A   | <i>Chem. Commun.</i> , <b>2015</b> , 51, 8334          |
| W-CNT                                                | N/A   | 435                                   | N/A | 103  | N/A   | <i>J. Mater. Chem. A</i> , <b>2015</b> , 3, 14609      |
| WS <sub>2</sub> nanosheet                            | 1     | 142                                   | 75  | 70   | N/A   | <i>Energy Environ. Sci.</i> , <b>2014</b> , 7, 2608    |
| WS <sub>2</sub> @rGO                                 | 0.4   | 270                                   | N/A | 58   | N/A   | <i>Angew. Chem. Int. Ed.</i> , <b>2013</b> , 52, 13751 |
| nw-W <sub>4</sub> Mo                                 | 1.28  | 128                                   | N/A | 52   | 0.029 | <i>Adv. Funct. Mater.</i> , <b>2015</b> , 25, 1520     |
| WS <sub>2</sub>                                      | 0.43  | 152                                   | 80  | 46   | N/A   | <i>Nanoscale</i> , <b>2016</b> , 8, 15262              |
| a-WNP<br>(W-Ni <sub>x</sub> P)                       | 1     | 110<br>(@ 20 mA<br>cm <sup>-2</sup> ) | 50  | 39   | 0.044 | <i>J. Mater. Chem. A</i> , <b>2014</b> , 2, 18593      |
| WSe <sub>2</sub> -C-20                               | N/A   | 158                                   | N/A | 98   | 0.24  | <i>J. Mater. Chem. A</i> , <b>2015</b> , 3, 18090      |
| Co <sub>x</sub> W <sub>(1-x)</sub> S <sub>2</sub>    | N/A   | 121                                   | N/A | 67   | N/A   | <i>Small</i> , <b>2016</b> , 12, 3802                  |

|                                                        |       |                                  |     |     |                      |                                                        |
|--------------------------------------------------------|-------|----------------------------------|-----|-----|----------------------|--------------------------------------------------------|
| Co <sub>9</sub> S <sub>8</sub> @MoS <sub>2</sub> /CNFs | 0.212 | 190                              | 64  | 110 | N/A                  | <i>Adv. Mater.</i> , <b>2015</b> , 27, 4752            |
| NiMoN                                                  | 2.5   | 109                              | 50  | 95  | 0.92                 | <i>Adv. Energy Mater.</i> , <b>2016</b> , 6, 1600221   |
| NiMo <sub>3</sub> S <sub>4</sub> hollow plates         | 0.3   | 257                              | 59  | 98  | 0.039                | <i>Angew. Chem. Int. Ed.</i> , <b>2016</b> , 55, 15240 |
| Co-Mo <sub>2</sub> C-0.02                              | 0.14  | 140                              | 40  | 39  | 5.1×10 <sup>-3</sup> | <i>Adv. Funct. Mater.</i> , <b>2016</b> , 26, 5590     |
| SV-MoS <sub>2</sub>                                    | N/A   | 170                              | N/A | 60  | N/A                  | <i>Nat. Mater.</i> , <b>2016</b> , 15, 48              |
| NENU-500 (Mo-MOF)                                      | 0.362 | 237                              | 180 | 96  | 0.036                | <i>J. Am. Chem. Soc.</i> , <b>2015</b> , 137, 7169     |
| nanoMoC@GS(700)                                        | 1.04  | 124                              | N/A | 43  | 0.015                | <i>J. Mater. Chem. A</i> , <b>2016</b> , 4, 6006       |
| Co-Mo-S hierarchical nanosheets                        | N/A   | 203 (@100 mA cm <sup>-2</sup> )  | 90  | 53  | N/A                  | <i>J. Mater. Chem. A</i> , <b>2016</b> , 4, 13731      |
| Amorphous MoP NP                                       | 1     | 90                               | N/A | 45  | 0.12                 | <i>Chem. Mater.</i> , <b>2014</b> , 26, 4826           |
| MoP@PC                                                 | 0.24  | 51                               | N/A | 45  | N/A                  | <i>Adv. Funct. Mater.</i> , <b>2015</b> , 25, 3899     |
| Co <sub>0.6</sub> Mo <sub>1.4</sub> N <sub>2</sub>     | 0.243 | 200                              | N/A | N/A | 0.23                 | <i>J. Am. Chem. Soc.</i> , <b>2013</b> , 135, 19186    |
| PDAP-MoCN-CO <sub>2</sub>                              | 0.4   | 140                              | 50  | 46  | N/A                  | <i>J. Am. Chem. Soc.</i> , <b>2015</b> , 137, 110      |
| MoS <sub>2</sub> @S-C <sub>PDA</sub>                   | N/A   | 160                              | 60  | 72  | 0.316                | <i>Chem. Commun.</i> , <b>2015</b> , 51, 5052          |
| Mo-W-P/CC                                              | N/A   | 138 (@ 100 mA cm <sup>-2</sup> ) | N/A | 31  | 0.288                | <i>Energy Environ. Sci.</i> , <b>2016</b> , 9, 1468    |

|                                          |       |     |     |      |        |                                                            |
|------------------------------------------|-------|-----|-----|------|--------|------------------------------------------------------------|
| MoO <sub>2</sub> P <sub>x</sub> /Mo foil | 0.1   | 135 | 80  | 62   | N/A    | <i>J. Mater. Chem. A</i> , <b>2016</b> ,<br>4, 1647        |
| MoC <sub>x</sub> @C-1                    | 0.354 | 79  | N/A | 56   | 0.27   | <i>J. Mater. Chem. A</i> , <b>2016</b> ,<br>4, 3947        |
| MoP <sub>2</sub> NP/Mo plate             | N/A   | 143 | N/A | 57   | 0.06   | <i>Nanoscale</i> , <b>2016</b> , 8, 8500                   |
| MCNS/NC<br>(Mo <sub>2</sub> C nanosheet) | 0.566 | 19  | 0   | 28.9 | 1.9    | <i>Nanoscale</i> , <b>2016</b> , 8,<br>16251               |
| Mo <sub>2</sub> C@C S-800                | 0.9   | 141 | N/A | 56   | 0.029  | <i>ACS Nano</i> , <b>2016</b> , 10,<br>8851                |
| NiMo-NGTs                                | 2     | 65  | N/A | 67   | 0.84   | <i>ACS Nano</i> , <b>2016</b> , 10,<br>10397               |
| Mo <sub>2</sub> C/CNT                    | 2     | 152 | N/A | 55.2 | 0.014  | <i>Energy Environ. Sci.</i> ,<br><b>2013</b> , 6, 943      |
| MoS <sub>2</sub> on graphene             | N/A   | 100 | 70  | 41   | 0.0182 | <i>Chem. Mater.</i> , <b>2016</b> , 28,<br>549             |
| MoSe <sub>2</sub> -NiSe                  | 0.285 | 210 | 150 | 74   | N/A    | <i>Chem. Mater.</i> , <b>2016</b> , 28,<br>1838            |
| HC800 (Ni-Mo <sub>2</sub> C)             | 0.12  | 192 | N/A | 98   | N/A    | <i>Chem. Mater.</i> , <b>2016</b> , 28,<br>6313            |
| 4L-MoS <sub>2</sub>                      | 0.3   | 178 | 120 | 60   | N/A    | <i>ACS Nano</i> , <b>2015</b> , 9, 3728                    |
| MoP@PC                                   | 0.41  | 153 | 77  | 66   | 0.21   | <i>Angew. Chem. Int. Ed.</i> ,<br><b>2016</b> , 55, 12854  |
| β-Mo <sub>2</sub> C nanotube             | 0.75  | 172 | 82  | 62   | 0.017  | <i>Angew. Chem. Int. Ed.</i> ,<br><b>2015</b> , 127, 15615 |
| MoC <sub>x</sub>                         | 0.8   | 142 | 25  | 53   | 0.023  | <i>Nat. Commun.</i> , <b>2015</b> , 6,<br>6512;            |
| MoP@PC                                   | 0.41  | 153 | 77  | 66   | 0.21   | <i>Angew. Chem. Int. Ed.</i> ,<br><b>2016</b> , 55, 12854  |
| MoO <sub>2</sub> @PC-rGO                 | 0.14  | 64  | 0   | 41   | 0.48   | <i>Angew. Chem. Int. Ed.</i> ,                             |

|                                                            |       |     |     |      |                      |                                                          |
|------------------------------------------------------------|-------|-----|-----|------|----------------------|----------------------------------------------------------|
|                                                            |       |     |     |      |                      | <b>2015, 54, 12928</b>                                   |
| Mo <sub>1</sub> Soy/rGO                                    | 0.47  | 109 | N/A | 62.7 | 0.037                | <i>Energy Environ. Sci.</i> ,<br><b>2013, 6, 1818</b>    |
| C-MoS <sub>2</sub>                                         | N/A   | 159 | 103 | 56.1 | N/A                  | <i>Nano Energy</i> , <b>2016, 22,</b><br>490             |
| Li-MoS <sub>2</sub> NS/CC                                  | 4     | 97  | 75  | 38   | N/A                  | <i>Carbon</i> , <b>2016, 98, 84</b>                      |
| MoS <sub>2</sub> /g-C <sub>3</sub> N <sub>4</sub>          | 0.3   | 140 | 26  | 45   | 8×10 <sup>-3</sup>   | <i>Nano Energy</i> , <b>2016, 27,</b><br>44              |
| CM-S (Cu <sub>2</sub> MoS <sub>y</sub> Se <sub>4-y</sub> ) | 2     | 170 | 96  | 52   | N/A                  | <i>Nano Energy</i> , <b>2016, 28,</b><br>366             |
| np-Mo <sub>2</sub> C NWs                                   | 0.21  | 130 | 70  | 60   | N/A                  | <i>Energy Environ. Sci.</i> ,<br><b>2014, 7, 387</b>     |
| Mo <sub>2</sub> C                                          | 0.102 | 198 | N/A | 56   | N/A                  | <i>J. Mater. Chem. A</i> , <b>2015,</b><br>3, 8361       |
| MoDCA-5                                                    | 0.25  | 78  | 6   | 41   | 0.179                | <i>Angew. Chem. Int. Ed.</i> ,<br><b>2015, 54, 14723</b> |
| Mo <sub>2</sub> C@NPC/NPRGO                                | 0.14  | 34  | 0   | 33.6 | 1.09                 | <i>Nat. Commun.</i> , <b>2016, 7,</b><br>11204           |
| MoSe <sub>2</sub> nanofilm                                 | N/A   | 250 | N/A | 59.8 | 3.8×10 <sup>-4</sup> | <i>Nano Lett.</i> , <b>2013, 13,</b><br>3426             |
| MoS <sub>2</sub> /RGO                                      | 0.28  | 140 | 100 | 41   | N/A                  | <i>J. Am. Chem. Soc.</i> , <b>2011,</b><br>133, 7296     |
| Mo <sub>2</sub> C/NCF                                      | 0.28  | 144 | 40  | 55   | N/A                  | <i>ACS Nano</i> , <b>2016, 10,</b><br>11337              |

\* $\eta_{10}$ : Unless stated, overpotential at 10 mA cm<sup>-2</sup> current density.

### S3. References

- (1) He, C.-T.; Jiang, L.; Ye, Z.-M.; Krishna, R.; Zhong, Z.-S.; Liao, P.-Q.; Xu, J.; Ouyang, G.; Zhang, J.-P.; Chen, X.-M. *J. Am. Chem. Soc.* **2015**, *137*, 7217.
- (2) Perdew, J. P.; Ernzerhof, M.; Burke, K. *J. Chem. Phys.* **1996**, *105*, 9982.
- (3) Nørskov, J. K.; Bligaard, T.; Logadottir, A.; Kitchin, J. R.; Chen, J. G.; Pandalov, S.; Stimming, U. *J. Electrochem. Soc.* **2005**, *152*, J23.

(4) Zheng, Y.; Jiao, Y.; Zhu, Y.; Li, L. H.; Han, Y.; Chen, Y.; Du, A.; Jaroniec, M.; Qiao, S. Z. *Nat. Commun.***2014**, *5*, 3783.
